# Supplementary material
Source: PubMed Central journal article supplement (PMC3347658)
Supplement: supp_2011.052787_2011.052787.Walne_suppl.pdf [file supp_2011.052787_2011.052787.Walne_suppl.pdf]

**Online Supplementary Table S1. Primers and conditions for exon amplification of the *MPL* gene.**

| Exon | Forward Primer          | Reverse Primer         | Conditions |
|------|-------------------------|------------------------|------------|
| 1    | CTGTGTCCTCTCTTTCAAATTC  | GCAGGAGAGCCTTTACTC     | A          |
| 2    | GTCAGCAGCCAAGGTGAG      | GGCCACATACATCAAAG      | A          |
| 3    | CAGGCAGTGAGAAGAAAATG    | ATGACAAGGGAGTCTTGGG    | A          |
| 4    | CAGGAGAATGACAGCCTAC     | ACGAACCTAGGTCTGGAATC   | A          |
| 5    | TATCCAGCAAGGAGCTGAG     | CTGTCCAGTGCAAGTTCG     | A          |
| 6    | GACAGGAATATGTTCAAGG     | AGAGCAATGAAAGCTGTATGG  | A          |
| 7    | ATAAAGACAGAGGAAAGCTC    | TTAAGTCCTTCTGTGACAAG   | A          |
| 8    | AACTCTGACCCTTCTGACC     | TAGATATACTAGCAGAGACTGG | A          |
| 9    | TCTCGGTTAGGGCGCTC       | ATCCAGCCAGCCCCTAC      | B          |
| 10   | TGACCTTGCGGGCCGAC       | GGTGACGTGCAGGAAGTG     | B          |
| 11   | CTGCCCACTGACTTC         | TAAAGCAGATCCTGTGGGAG   | A          |
| 12   | CCCCAACAATACAACCTTGTTTC | CTAATTGTGAGGCAGACAG    | A          |

A: annealing temperature 58°C, 32 cycles, 2.0mM MgCl<sub>2</sub>, 10% DMSO; B: annealing temperature 60°C, 36 cycles, 1.5mM MgCl<sub>2</sub>, 10% DMSO.
