# Supplementary material
Source: PubMed Central journal article supplement (PMC3347658)
Supplement: supp_2011.052787_2011_052787-Contributions.pdf [file supp_2011.052787_2011_052787-Contributions.pdf]

**Manuscript no. HAEMATOL/2011/052787 entitled “Exome sequencing identifies MPL as a causative gene in familial aplastic anaemia”**

**Authors: Amanda J. Walne, Arran Dokal, Vincent Plagnol, Richard Beswick, Michael Kirwan, Josu de la Fuente, Tom Vulliamy, and Inderjeet Dokal**

**Information about the contributions of each person named as having participated in the study**

**1) Guarantor(s)**, i.e., person(s) who is (are) responsible for the integrity of the work as a whole:  
• Inderjeet Dokal, Queen Mary University of London, i.dokal@qmul.ac.uk

According to the International Committee of Medical Journal Editors (ICMJE) ([http://www.icmje.org/ethical\\_1author.html](http://www.icmje.org/ethical_1author.html)): “*Authorship credit should be based on: 1) substantial contributions to conception and design, acquisition of data, or analysis and interpretation of data; 2) drafting the article or revising it critically for important intellectual content; and 3) final approval of the version to be published. Authors should meet conditions 1, 2, and 3 ..... Acquisition of funding, collection of data, or general supervision of the research group alone does not constitute authorship*”.

The guarantors of this manuscript confirm that all persons designated as authors qualify for authorship, and that each author has participated sufficiently in the work to take public responsibility for appropriate portions of the content.

**2) Authors who participated in the conception of the study:** Inderjeet Dokal, Tom Vulliamy, Amanda Walne

**3) Design & Methods.** The following authors were responsible for specific investigations (please detail):

- Amanda Walne and Tom Vulliamy contributed to the design of all experimental work
- Richard Beswick, Vincent Plagnol, Michael Kirwan and Arran Dokal were responsible for contributing to the design of specific experimental details within the project

**4) Results.** The following authors were responsible for specific portions of the results, including figures and tables (please indicate the person responsible for each figure and each table):

- Arran Dokal and Amanda Walne were responsible for screening the patient samples and the results presented within figure 1
- Amanda Walne and Inderjeet Dokal were responsible for the presentation of the data in table 1
- Vincent Plagnol was responsible for the exome sequencing pipeline analysis
- Richard Beswick was responsible for figure 2
- Josu de la Fuente was responsible for acquisition of some of the patient material and clinical information

**5) Writing the manuscript.** The following authors were responsible for writing the manuscript:

- Amanda Walne and Inderjeet Dokal had overall responsibility for drafting and editing the manuscript
- Vincent Plagnol, Arran Dokal, Josu de la Fuente and Richard Beswick were responsible for editing specific sections of the manuscript relating to their contribution and approval of the final version
- Tom Vulliamy and Michael Kirwan were responsible for critical review of the manuscript

**6) Contributors Listed in Acknowledgments:**

Dr Abdelkefi (Tunisia) and Dr Richards (UK) are specifically acknowledged for providing patient samples. All clinicians and their patients are acknowledged for their continuing support of our research. This work was funded by The Wellcome Trust.
